# Supplementary material for: Synthesis, structural characterization, photoluminescence and thermal properties of [(Ph3P)2Cu(μ-SeC{O}R)2Cu(PPh3)]
Source: Royal Society of Chemistry journal article supplement (doi:10.1039/b203466b), 2002-01-01
Supplement: b203466b.pdf [file b203466b.pdf]

# Synthesis, Structural Characterization, Photoluminescence and Thermal properties of $[(\text{Ph}_3\text{P})_2\text{Cu}(\mu\text{-SeC}\{\text{O}\}\text{R})_2\text{Cu}(\text{PPh}_3)]$

Zheng Lu,<sup>a</sup> Wei Huang<sup>b</sup> and Jagadese J. Vittal<sup>a</sup>

<sup>a</sup>Department of Chemistry, National University of Singapore, 3 Science Drive, SINGAPORE 117543; <sup>b</sup>Institute of Materials Science and Engineering, 3 Science Link, SINGAPORE 117602

## Electronic Supplementary Information

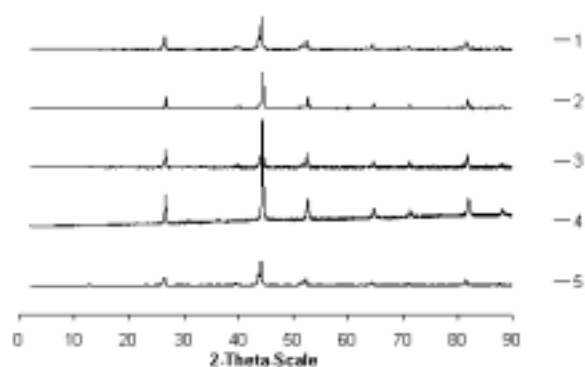

Fig. S1 XRPD for the residues from pyrolysis of **1-5**.

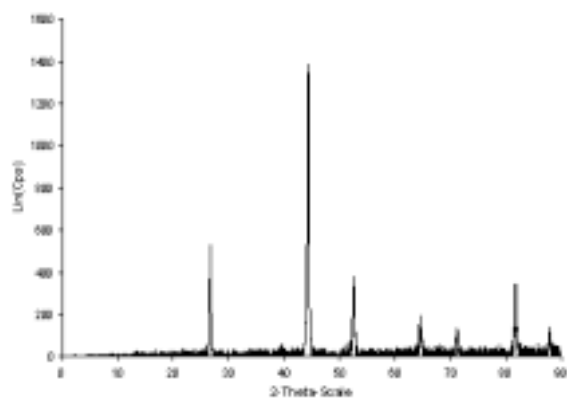

Fig. S2. XRPD for the residues from compound, **6**.

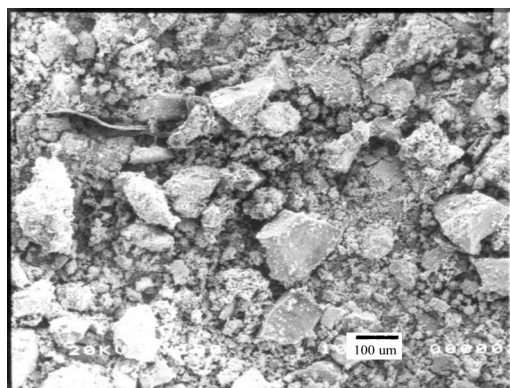

1

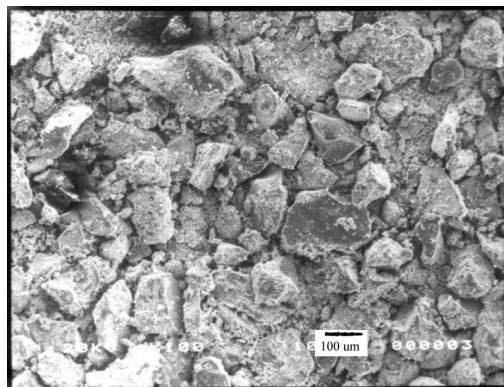

2

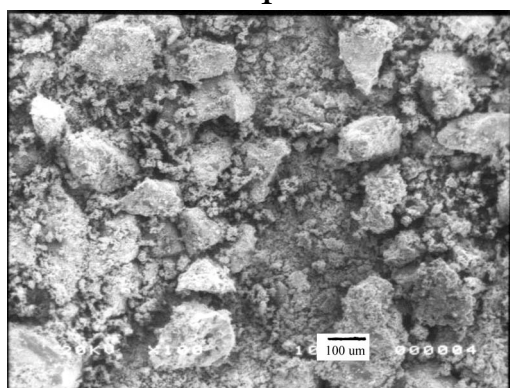

3

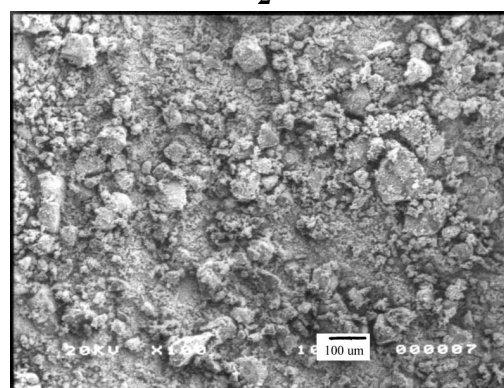

4

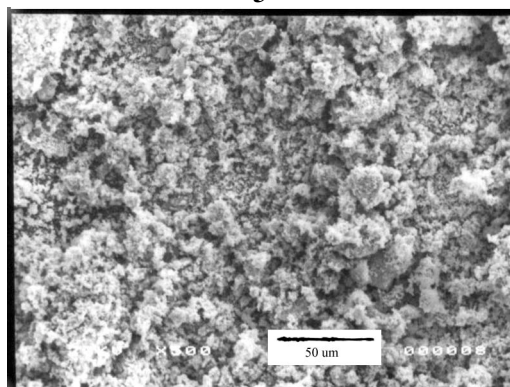

5

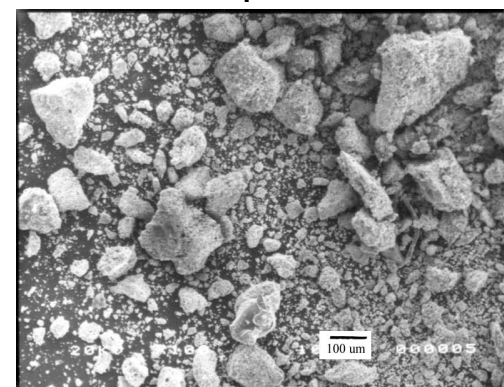

6

Fig. S3. SEM for residues from compounds 1-6.
